# Supplementary material
Source: PubMed Central journal article supplement (PMC4403264)
Supplement: NIHMS664444-supplement-supplement_1.pdf [file NIHMS664444-supplement-supplement_1.pdf]

## Supplementary tables:

Table 1: Modified condition category constituents

| Modified condition category name and number                                          | Constituent CMS condition category codes         | Additional ICD-9 CM diagnostic codes                                                                                                  |
|--------------------------------------------------------------------------------------|--------------------------------------------------|---------------------------------------------------------------------------------------------------------------------------------------|
| 1. Heart failure                                                                     | 80                                               |                                                                                                                                       |
| 2. Acute myocardial infarction                                                       | 81                                               |                                                                                                                                       |
| 3. Unstable angina and other ischemic heart disease                                  | 82                                               |                                                                                                                                       |
| 4. Chronic angina and coronary heart disease                                         | 83, 84                                           |                                                                                                                                       |
| 5. Valvular/ Rheumatic heart disease                                                 | 86                                               |                                                                                                                                       |
| 6. Other cardiac disease including congenital heart disease and hypertensive disease | 85, 87 – 91, 94                                  |                                                                                                                                       |
| 7. Arrhythmias and conduction disorders                                              | 92, 93                                           |                                                                                                                                       |
| 8. Chest pain                                                                        | N/A (Constituent ICD-9-CM codes on the right)    | 786.50, 786.59                                                                                                                        |
| 9. Syncope                                                                           | N/A (Constituent ICD-9-CM codes on the right)    | 780.2                                                                                                                                 |
| 10. Acute stroke (ischemic or unspecified stroke)                                    | 96                                               |                                                                                                                                       |
| 11. Precerebral arterial occlusion or transient cerebral ischemia                    | 97                                               |                                                                                                                                       |
| 12. Pulmonary embolism/Deep venous thrombosis                                        | N/A (Constituent ICD-9-CM codes on the right)    | 415.1, 415.11, 415.19, 453.4, 453.40, 453.41, 453.42, 453.8, 453.8(1-7,9), 453.9                                                      |
| 13. Other peripheral vascular disease                                                | 104 – 106 (Excluded ICD-9-CM codes on the right) | Exclude: 415.1, 415.11, 415.19, 453.4, 453.40, 453.41, 453.42, 453.8, 453.8(1-7,9), 453.9, 458.0, 458.1, 458.21, 458.29, 458.8, 458.9 |
| 14. Cardio-respiratory failure                                                       | 77 – 79                                          |                                                                                                                                       |
| 15. COPD/Asthma - Fibrosis of lungs and other lung disorders                         | 108 – 110                                        |                                                                                                                                       |
| 16. Pneumonia including aspiration pneumonitis                                       | 111 – 113                                        |                                                                                                                                       |
| 17. Septicemia/shock                                                                 | 2                                                |                                                                                                                                       |
| 18. UTI and urinary system complaint                                                 | 135                                              |                                                                                                                                       |
| 19. Cellulitis, local skin infections                                                | 152                                              |                                                                                                                                       |
| 20. Surgical site infection and wound disruption                                     | N/A (Constituent ICD-9-CM codes on the right)    | 998.5, 998.51, 998.59, 998.3, 998.30, 998.31, 99.32                                                                                   |
| 21. Central nervous system infections                                                | 3                                                |                                                                                                                                       |
| 22. Clostridium difficile-associated                                                 | N/A (Constituent ICD-9-CM                        | 8.45                                                                                                                                  |

|                                                                                                                                    |                                               |                                                                                                                                                                                                                                                                                                                                                                                                                                                                                                            |
|------------------------------------------------------------------------------------------------------------------------------------|-----------------------------------------------|------------------------------------------------------------------------------------------------------------------------------------------------------------------------------------------------------------------------------------------------------------------------------------------------------------------------------------------------------------------------------------------------------------------------------------------------------------------------------------------------------------|
| infections                                                                                                                         | codes on the right)                           |                                                                                                                                                                                                                                                                                                                                                                                                                                                                                                            |
| 23. Renal disorder including renal failure and fluid, electrolyte, and acid base abnormalities                                     | 23, 131                                       |                                                                                                                                                                                                                                                                                                                                                                                                                                                                                                            |
| 24. Cerebral Hemorrhage                                                                                                            | 95                                            |                                                                                                                                                                                                                                                                                                                                                                                                                                                                                                            |
| 25. Hemorrhage (including GI hmg, GU hmg, hemorrhagic anemia and other anticoagulation related hemorrhage, excluding cerebral hmg) | N/A (Constituent ICD-9-CM codes on the right) | 285.1, 286.5, 286.7, 286.9, 531.0, 531.00, 531.01, 531.2, 531.20, 531.21, 531.4, 531.40, 531.41, 531.6, 531.60, 531.61, 532.0, 532.00, 532.01, 532.2, 532.20, 532.21, 532.4, 532.40, 532.41, 532.6, 532.60, 532.61, 533.0, 533.00, 533.01, 533.2, 533.20, 533.21, 533.4, 533.40, 533.41, 533.6, 533.60, 533.61, 534.0, 534.00, 534.01, 534.2, 534.20, 534.21, 534.4, 534.40, 534.41, 534.6, 534.60, 534.61, 535.01, 535.11, 535.41, 535.51, 535.61, 562.02, 562.12, 569.3, 578, 578.0, 578.1, 578.9, 596.7 |
| 26. Diabetes and its complications                                                                                                 | 15, 16, 17, 18, 19, 20                        |                                                                                                                                                                                                                                                                                                                                                                                                                                                                                                            |
| 27. Complications of care                                                                                                          | 163, 164, 165                                 |                                                                                                                                                                                                                                                                                                                                                                                                                                                                                                            |
| 28. Migraine and other headache syndromes                                                                                          | N/A (Constituent ICD-9-CM codes on the right) | 346, 346.(0-9), 339, 339.0, 339.0(1-5), 339.09, 339.1, 339.1(0-2), 339.3, 339.4, 339.4(1-4), 339.8, 339.8(1-5,9), 349.0, 784.0                                                                                                                                                                                                                                                                                                                                                                             |
| 29. Disorders of peripheral nervous system                                                                                         |                                               | 351, 351.0, 351.8, 351.9, 352.3, 352.5                                                                                                                                                                                                                                                                                                                                                                                                                                                                     |
| 30. Other admitting diagnosis                                                                                                      | See supplementary table 2                     |                                                                                                                                                                                                                                                                                                                                                                                                                                                                                                            |

Table 2: Other admitting diagnosis

| Modified condition category name and number | Constituent CMS condition category codes       | Additional ICD-9 CM diagnostic codes                                                                                                                                                                                                                                                                                                                              |
|---------------------------------------------|------------------------------------------------|-------------------------------------------------------------------------------------------------------------------------------------------------------------------------------------------------------------------------------------------------------------------------------------------------------------------------------------------------------------------|
| 1. Other infections                         | 1, 4, 5, 6                                     |                                                                                                                                                                                                                                                                                                                                                                   |
| 2. Cancer                                   | 7 -14                                          |                                                                                                                                                                                                                                                                                                                                                                   |
| 3. Endocrine/Metabolic                      | 21, 22, 24                                     |                                                                                                                                                                                                                                                                                                                                                                   |
| 4. Liver and gall bladder diseases          | 25 – 30                                        |                                                                                                                                                                                                                                                                                                                                                                   |
| 5. Digestive (Gastrointestinal)             | 31 -36 (Excluding ICD-9-CM codes on the right) | Exclude: 531.0, 531.00, 531.01, 531.2, 531.20, 531.21, 531.4, 531.40, 531.41, 531.6, 531.60, 531.61, 532.0, 532.00, 532.01, 532.2, 532.20, 532.21, 532.4, 532.40, 532.41, 532.6, 532.60, 532.61, 533.0, 533.00, 533.01, 533.2, 533.20, 533.21, 533.4, 533.40, 533.41, 533.6, 533.60, 533.61, 534.0, 534.00, 534.01, 534.2, 534.20, 534.21, 534.4, 534.40, 534.41, |

|                                                        |                                                  |                                                                                                                                  |
|--------------------------------------------------------|--------------------------------------------------|----------------------------------------------------------------------------------------------------------------------------------|
|                                                        |                                                  | 534.6, 534.60,<br>534.61, 535.01,<br>535.11, 535.41,<br>535.51, 535.61,<br>562.02, 562.12,<br>569.3, 578, 578.0,<br>578.1, 578.9 |
| 6. Musculoskeletal                                     | 37 – 43                                          |                                                                                                                                  |
| 7. Other hematologic                                   | 44 – 46                                          |                                                                                                                                  |
| 8. Cognitive                                           | 48 – 50                                          |                                                                                                                                  |
| 9. Substance abuse                                     | 51 – 53                                          |                                                                                                                                  |
| 10. Psychiatric                                        | 54 – 60                                          |                                                                                                                                  |
| 11. Development disorder                               | 61 – 66                                          |                                                                                                                                  |
| 12. Spinal cord                                        | 67 – 69                                          |                                                                                                                                  |
| 13. Neuromuscular                                      | 70 – 76                                          |                                                                                                                                  |
| 14. Non-acute cerebrovascular disease                  | 98 -103                                          |                                                                                                                                  |
| 15. Other pulmonary                                    | 107                                              |                                                                                                                                  |
| 16. Pleural effusion/pneumothorax                      | 114                                              |                                                                                                                                  |
| 17. Ophthalmologic                                     | 116 – 124                                        |                                                                                                                                  |
| 18. Ear, nose and throat                               | 125 – 127                                        |                                                                                                                                  |
| 19. Other renal                                        | 128 – 130, 132                                   |                                                                                                                                  |
| 20. Genitourinary                                      | 133, 134, 136 – 140                              |                                                                                                                                  |
| 21. Obstetric                                          | 141 – 147                                        |                                                                                                                                  |
| 22. Skin ulcer including decubitus ulcer               | 148, 149                                         |                                                                                                                                  |
| 23. Other dermatological                               | 150, 151, 153                                    |                                                                                                                                  |
| 24. Injury including hip fracture                      | 154 – 162                                        |                                                                                                                                  |
| 25. Symptoms (major and minor) excluding respiratory   | 166, 167 (Excluding ICD-9-CM codes on the right) | Exclude: 786.50, 786.59, 780.2                                                                                                   |
| 26. Neonatal                                           | 168 – 172                                        |                                                                                                                                  |
| 27. Organ transplant                                   | 173 – 175                                        |                                                                                                                                  |
| 28. Miscellaneous surgical and non-surgical procedures | 176 – 182                                        |                                                                                                                                  |
| 29. Durable medical equipment                          | 185 – 189                                        |                                                                                                                                  |
| 30. Other                                              | 183, 184                                         |                                                                                                                                  |
| 31. Hypotension                                        |                                                  | 458.0, 458.1, 458.21, 458.29, 458.8, 458.9                                                                                       |

Table 3 Baseline characteristics of the propensity-matched cohort

|                                | CAS<br>(N=32119)<br>N (%) | CEA<br>(N=32119)<br>N (%) | Standardized<br>Difference<br>(%) |
|--------------------------------|---------------------------|---------------------------|-----------------------------------|
| <i>Demographics</i>            |                           |                           |                                   |
| Aged 65 (Age > 65, Continuous) | 11.19 (6.59)              | 11.2 (6.42)               | -0.21                             |
| Male gender                    | 17413 (54.21)             | 17697 (55.1)              | -1.79                             |
| Caucasian race                 | 29152 (90.76)             | 29054 (90.46)             | 1.03                              |
| <i>Vascular Comorbidity</i>    |                           |                           |                                   |
| Symptomatic Carotid Stenosis   | 4409 (13.73)              | 4449 (13.85)              | -0.35                             |
| Diabetes or DM complications   | 13279 (41.34)             | 13509 (42.06)             | -1.46                             |

|                                                                      |               |               |       |
|----------------------------------------------------------------------|---------------|---------------|-------|
| Diabetes with Neurologic or Peripheral Circulatory Manifestation     | 2205 (6.87)   | 2263 (7.05)   | -0.71 |
| Precerebral Arterial Occlusion and Transient Cerebral Ischemia       | 23740 (73.91) | 23947 (74.56) | -1.49 |
| Cerebral Atherosclerosis and Aneurysm                                | 5345 (16.64)  | 5072 (15.79)  | 2.31  |
| Cerebrovascular Disease, Unspecified                                 | 1230 (3.83)   | 1277 (3.98)   | -0.77 |
| Cerebrovascular Disease Late Effects, Unspecified                    | 1609 (5.01)   | 1595 (4.97)   | 0.18  |
| Vascular Disease with Complications                                  | 2011 (6.26)   | 2129 (6.63)   | -1.51 |
| Vascular Disease                                                     | 14423 (44.9)  | 14871 (46.3)  | -2.81 |
| <i>Other Comorbidity</i>                                             |               |               |       |
| History of infection                                                 | 6230 (19.4)   | 6221 (19.37)  | 0.08  |
| Metastatic cancer or acute leukemia                                  | 549 (1.71)    | 596 (1.86)    | -1.13 |
| Cancer                                                               | 6934 (21.59)  | 7089 (22.07)  | -1.16 |
| Benign neoplasms of skin, breast and eye                             | 4031 (12.55)  | 4008 (12.48)  | 0.21  |
| Protein-calorie malnutrition                                         | 1068 (3.33)   | 1051 (3.27)   | 0.34  |
| Disorders of fluid, electrolyte, acid-base                           | 6695 (20.84)  | 6734 (20.97)  | -0.32 |
| Other Endocrine/Metabolic/Nutritional Disorders                      | 26681 (83.07) | 26906 (83.77) | -1.88 |
| Pancreatic Disease                                                   | 468 (1.46)    | 501 (1.56)    | -0.82 |
| Peptic Ulcer, Hemorrhage, Other Specified Gastrointestinal Disorders | 2543 (7.92)   | 2596 (8.08)   | -0.59 |
| Severe hematological disorders                                       | 471 (1.47)    | 514 (1.6)     | -1.06 |
| Dementia or other specified brain disorders                          | 4759 (14.82)  | 4751 (14.79)  | 0.08  |
| Hemiplegia, paraplegia, paralysis, functional disability             | 2921 (9.09)   | 2943 (9.16)   | -0.24 |
| Congestive heart failure                                             | 7687 (23.93)  | 8057 (25.08)  | -2.67 |
| Acute coronary syndrome                                              | 3305 (10.29)  | 3458 (10.77)  | -1.56 |
| Coronary atherosclerosis or angina                                   | 20297 (63.19) | 20920 (65.13) | -4.05 |
| Hypertensive Heart and Renal Disease or Encephalopathy               | 4911 (15.29)  | 5131 (15.97)  | -1.87 |
| Hypertensive heart disease                                           | 2226 (6.93)   | 2295 (7.15)   | -0.86 |
| Hypertension                                                         | 27627 (86.01) | 27663 (86.13) | -0.35 |
| Specified arrhythmias                                                | 11075 (34.48) | 11213 (34.91) | -0.90 |
| Ischemic or Unspecified Stroke                                       | 7570 (23.57)  | 7624 (23.74)  | -0.40 |
| COPD                                                                 | 9467 (29.47)  | 9649 (30.04)  | -1.25 |
| Pneumonia                                                            | 4142 (12.9)   | 4282 (13.33)  | -1.27 |
| Other Lung Disorders                                                 | 8183 (25.48)  | 8214 (25.57)  | -0.21 |
| End stage renal disease or dialysis                                  | 388 (1.21)    | 405 (1.26)    | -0.45 |
| Renal failure                                                        | 6127 (19.08)  | 6404 (19.94)  | -2.17 |
| Chronic Ulcer of Skin, Except Decubitus                              | 1282 (3.99)   | 1350 (4.2)    | -1.06 |
| Cellulitis, local skin infection                                     | 2860 (8.9)    | 2912 (9.07)   | -0.59 |
| Other injuries                                                       | 7292 (22.7)   | 7382 (22.98)  | -0.67 |
